# Supplementary material for: A Deletion in the Canine POMC Gene Is Associated with Weight and Appetite in Obesity-Prone Labrador Retriever Dogs
Source: PubMed Central journal article supplement (PMC4873617; doi:10.1016/j.cmet.2016.04.012), 2016-05-10
Supplement: mmc1.pdf [file mmc1.pdf]

**Supplemental Information**

**A Deletion in the Canine *POMC* Gene  
Is Associated with Weight and Appetite  
in Obesity-Prone Labrador Retriever Dogs**

**Eleanor Raffan, Rowena J. Dennis, Conor J. O'Donovan, Julia M. Becker, Robert A. Scott, Stephen P. Smith, David J. Withers, Claire J. Wood, Elena Conci, Dylan N. Clements, Kim M. Summers, Alexander J. German, Cathryn S. Mellersh, Maja L. Arendt, Valentine P. Iyemere, Elaine Withers, Josefin Söder, Sara Wernersson, Göran Andersson, Kerstin Lindblad-Toh, Giles S.H. Yeo, and Stephen O'Rahilly**

1 **SUPPLEMENTAL INFORMATION – RAFFAN ET AL**

2 **SUPPLEMENTAL DATA ITEMS**

3 **Supplemental table 1 – Results of candidate gene sequencing. Related to Figure 1.**

4 Variations (Var) from the canine reference genome (CanFam3.1) found on candidate gene  
 5 sequencing. Number of dogs and their genotypes are shown. <sup>a</sup>V213F in MC4R has previously been  
 6 shown not to affect receptor function<sup>1</sup>. <sup>b</sup>Deletion detailed in main paper. <sup>c</sup>rs22557623. <sup>d</sup>rs22557625.  
 7 WT, wild type. \*See Supplementalfigure 1.

| Gene | Position in Ensembl CanFam3.1 | Reference Allele      | Mutant Allele | Consequence       | Obese dogs |          |          | Lean dogs |          |          | p value of Fisher's exact test |
|------|-------------------------------|-----------------------|---------------|-------------------|------------|----------|----------|-----------|----------|----------|--------------------------------|
|      |                               |                       |               |                   | WT/WT      | WT/Var   | Var/Var  | WT/WT     | WT/Var   | Var/Var  |                                |
| MC4R | 1:16132465                    | G                     | T             | V213F             | 9          | 1        | 0        | 12        | 1        | 0        | 1.000 <sup>a</sup>             |
|      | 1:16132605                    | T                     | C             | synonymous coding | 0          | 0        | 9        | 0         | 0        | 13       | Invariant                      |
|      | 1:16132817                    | G                     | T             | S330I             | 9          | 0        | 0        | 12        | 1        | 0        | 1.000                          |
|      | 1:16132860                    | C                     | G             | intronic          | 0          | 0        | 9        | 0         | 0        | 12       | Invariant                      |
|      | 1:16133054                    | C                     | T             | intronic          | 0          | 3        | 5        | 1         | 4        | 6        | 1.000                          |
| POMC | 17:19431664                   | G                     | T             | S239I             | 13         | 0        | 0        | 17        | 1        | 0        | 1.000                          |
|      | <b>17:19431807</b>            | <b>GCGCCGGCCCGGGA</b> | <b>-</b>      | <b>P187fs</b>     | <b>5</b>   | <b>8</b> | <b>2</b> | <b>16</b> | <b>2</b> | <b>0</b> | <b>0.001<sup>b</sup></b>       |
|      | 17:19431813                   | C                     | G             | synonymous coding | 0          | 0        | 5        | 0         | 0        | 16       | Invariant                      |
|      | 17:19431820                   | A                     | AG            | P187PE*           | 0          | 0        | 15       | 0         | 0        | 18       | Invariant                      |
|      | 17:19431850                   | C                     | G             | R178G             | 0          | 0        | 12       | 0         | 0        | 17       | Invariant                      |
|      | 17:19431861                   | A                     | G             | K174R             | 0          | 0        | 12       | 0         | 0        | 17       | Invariant                      |
|      | 17:19431983                   | C                     | G             | synonymous coding | 13         | 0        | 0        | 19        | 1        | 0        | 1.000                          |
|      | 17:19432208                   | G                     | A             | synonymous coding | 9          | 3        | 0        | 15        | 4        | 0        | 1.000                          |
|      | 17:19432226                   | C                     | A             | synonymous coding | 6          | 6        | 0        | 6         | 9        | 4        | 0.452                          |
|      | 17:19432391                   | GGGCGAGCTCCTG         | -             | intronic          | 7          | 4        | 0        | 10        | 7        | 0        | 1.000                          |
|      | 17:19432427                   | C                     | G             | intronic          | 6          | 3        | 1        | 6         | 6        | 3        | 0.428 <sup>c</sup>             |
|      | 17:19432428                   | A                     | C             | intronic          | 6          | 4        | 0        | 6         | 9        | 0        | 0.428 <sup>d</sup>             |
|      | 17:19434068                   | T                     | C             | intronic          | 8          | 2        | 1        | 5         | 2        | 2        | 0.642                          |

8  
9

10 **Supplemental table 2 – Breeds of dogs tested for both the *POMC* mutation and for naturally**  
 11 **occurring variation in the *POMC* gene. Related to Figure 1.**

| <b>Breed</b>                                                                                                                                                                                                                                               | <b>Number of dogs tested for:</b> |                                      |
|------------------------------------------------------------------------------------------------------------------------------------------------------------------------------------------------------------------------------------------------------------|-----------------------------------|--------------------------------------|
|                                                                                                                                                                                                                                                            | <b><i>POMC</i> mutation</b>       | <b>Variation in <i>POMC</i> gene</b> |
| Beagle                                                                                                                                                                                                                                                     | 17                                | 2                                    |
| Bearded collie                                                                                                                                                                                                                                             | 16                                | 2                                    |
| Bernese mountain dog                                                                                                                                                                                                                                       | 20                                | 0                                    |
| Border Collie                                                                                                                                                                                                                                              | 18                                | 2                                    |
| Boxer                                                                                                                                                                                                                                                      | 17                                | 2                                    |
| Bull terrier                                                                                                                                                                                                                                               | 8                                 | 1                                    |
| Cairn terrier                                                                                                                                                                                                                                              | 8                                 | 1                                    |
| English springer spaniel                                                                                                                                                                                                                                   | 17                                | 2                                    |
| Finsk lapphund                                                                                                                                                                                                                                             | 8                                 | 1                                    |
| Flat coat retriever                                                                                                                                                                                                                                        | 8                                 | 1                                    |
| Giant schnauzer                                                                                                                                                                                                                                            | 16                                | 2                                    |
| Golden retriever                                                                                                                                                                                                                                           | 55                                | 55                                   |
| Great Dane                                                                                                                                                                                                                                                 | 16                                | 2                                    |
| Hovawart                                                                                                                                                                                                                                                   | 16                                | 2                                    |
| Irish wolfhound                                                                                                                                                                                                                                            | 16                                | 2                                    |
| Leonberger                                                                                                                                                                                                                                                 | 8                                 | 1                                    |
| Newfoundland                                                                                                                                                                                                                                               | 16                                | 2                                    |
| Polish lowland                                                                                                                                                                                                                                             | 8                                 | 1                                    |
| Poodle                                                                                                                                                                                                                                                     | 16                                | 2                                    |
| Rottweiler                                                                                                                                                                                                                                                 | 20                                | 0                                    |
| Shar pei                                                                                                                                                                                                                                                   | 16                                | 2                                    |
| Swedish elkhound                                                                                                                                                                                                                                           | 16                                | 2                                    |
| Welsh springer spaniel                                                                                                                                                                                                                                     | 16                                | 2                                    |
| Whippet                                                                                                                                                                                                                                                    | 9                                 | 1                                    |
| 14 Other breeds: Crossbreed, cavalier King Charles spaniel, German shepherd, mastiff, shih tzu, Tibetan terrier, Border terrier, cocker spaniel, Dalmatian, dachshund, Doberman pinscher, pointer, Staffordshire bull terrier, West Highland white terrier | 20                                | 0                                    |

13 **Supplemental Table 3 – Results of microsatellite genotyping in wild type and homozygous**  
 14 **deletion Labrador retrievers and FCR. Related to figure 1.**  
 15 Amplification of microsatellites 17\_021D\_CT (which lies 527 kb upstream of the deletion) and  
 16 17\_022B\_CA (66 kb downstream of the deletion) showed all FCR and Labrador retrievers  
 17 homozygous for the POMC deletion were homozygous for the same microsatellite alleles, whereas  
 18 wild type dogs carried various different alleles, evidence that the mutation is identical by descent in  
 19 the two breeds. All map positions as per DOGSET (CanFam2)<sup>2</sup>.  
 20  
 21

| DOGSET marker name   | Physical/map position on Chromosome 17 bp/centimorgans | Alleles present (length of amplicon x no. of dogs with that allele)                    |                                            |                                                                                        |                                           |
|----------------------|--------------------------------------------------------|----------------------------------------------------------------------------------------|--------------------------------------------|----------------------------------------------------------------------------------------|-------------------------------------------|
|                      |                                                        | Labrador retrievers                                                                    |                                            | Flat coat retrievers                                                                   |                                           |
| 17_021D_CT           | 21885226/13.949                                        | 363/363 x 15<br>365/365 x 1                                                            | 365/365 x 12                               | 363/363 x 10<br>363/369 x 3<br>372/372 x 1                                             | 365/365 x 15                              |
| <i>POMC</i> deletion | 22412852/13.949                                        | <b>Wild type</b>                                                                       | <b>Homozygous Deletion</b>                 | <b>Wild type</b>                                                                       | <b>Homozygous Deletion</b>                |
| 17_022B_CA           | 22478898/13.949                                        | 409/409 x 1<br>411/411 x 8<br>411/413 x 2<br>413/413 x 4                               | 413/413 x 12                               | 409/409 x 2<br>409/411 x 1<br>409/415 x 1<br>411/411 x 4<br>411/413 x 1<br>413/413 x 3 | 413/413 x 16                              |
| 17_022C_CA           | 22558098/13.949                                        | 369/369 x 1<br>369/371 x 3<br>369/375 x 2<br>371/371 x 2<br>371/375 x 2<br>375/375 x 4 | 371/371 x 10<br>369/369 x 1<br>371/373 x 1 | 369/369 x 6<br>369/371 x 4<br>371/371 x 1<br>371/375 x 2                               | 371/371 x 9<br>371/369 x 3<br>369/369 x 1 |

22  
 23 **Supplemental Table 4 – Distribution of alleles in working and show strains of Labrador retrievers**  
 24 There was no difference between the incidence of the mutation between dogs from ‘working’ and  
 25 ‘show’ lines (Chi-squared test of wild type vs. carrier  $p > 0.3$ ). Related to figure 1.  
 26

|                | Wild Type | Heterozygous | Homozygous Deletion |
|----------------|-----------|--------------|---------------------|
| <b>Working</b> | 94        | 27           | 3                   |
| <b>Show</b>    | 21        | 9            | 1                   |

27  
 28

29 **Supplemental Figure 1 – Clustal Omega alignment of the CanFam3.1 reference sequence with**  
 30 **sequence in Labrador retrievers and other breeds for exons 3-4 of POMC. Related to Figure 1.**  
 31 Alignment annotated to show variation from the reference sequence identified in Labrador  
 32 retrievers and other breeds (see Supplemental table 1). Underlined bases denote position of  
 33 frameshift deletion. (a) 17: 19431861, A>G in all dogs sequenced with consequence p.K174R, which  
 34 changes the distal di-basic cleavage site for ACTH to ‘KR’ from ‘KK’ which is the same as the human  
 35 reference sequence. (b) 17: 19431850 C>G in all dogs sequenced, consequence p.R178G which is  
 36 identical to the human reference sequence. (c) 17:19431821 C>CG. This single base pair insertion at  
 37 the start of what is annotated as a two base pair intron (highlighted blue) has the consequence  
 38 p.P187>PE which results in closer homology to the human reference sequence. (d) 17:19431813  
 39 C>G in all dogs sequenced, synonymous coding. (e) 17:19431777 C>T, novel synonymous coding  
 40 SNP. (f) 17:19431764 G>T, p.E206D, not found in Labrador retrievers or FCR.

41

CLUSTAL Q(1.2.1) multiple sequence alignment

```

POMC_reference_CanFam3.1      GCGTGCATCCGGGCTGCAAGCCCACCTCTCCGCCGAGACGCCCGTGCTCCCCGGCAAC
All_breed_consensus          GCGTGCATCCGGGCTGCAAGCCCACCTCTCCGCCGAGACGCCCGTGCTCCCCGGCAAC
.....

POMC_reference_CanFam3.1      GCGGACGAGCAGCCGCTGGCTGAGAACCCCGGAAGTACGTATGGGCCACTTCCGCTGG
All_breed_consensus          GCGGACGAGCAGCCGCTGGCTGAGAACCCCGGAAGTACGTATGGGCCACTTCCGCTGG
.....

POMC_reference_CanFam3.1      GACCGGTTTGGCCCGCAATGGCAGCGCGGCCAGAAAGCGAGGAGAAAGAGGTGGCG
All_breed_consensus          GACCGGTTTGGCCCGCAATGGCAGCGCGGCCAGAAAGCGAGGAGAAAGAGGTGGCG
.....

POMC_reference_CanFam3.1      GCGGGCGGAGGCCCGCCCCGCTGCCCGCGGGCGGCCCGGGCCCCCGCGGACGGTGGC
All_breed_consensus          GCGGGCGGAGGCCCGCCCCGCTGCCCGCGGGCGGCCCGGGCCCCCGCGGACGGTGGC
.....

POMC_reference_CanFam3.1      GAGCTCGGCCTGCAAGAGGGCAAGCGCTCCTACTCCATGGAGCACTTCCGCTGGGGCAAG
All_breed_consensus          GAGCTCGGCCTGCAAGAGGGCAAGCGCTCCTACTCCATGGAGCACTTCCGCTGGGGCAAG
.....

POMC_reference_CanFam3.1      CCGGTGGGCAAGAAGCGCGCCCGGTGAAGGTGTACCCCAACGGCGCTGAGGACGAGTCG
All_breed_consensus          CCGGTGGGCAAGAAGCGCGCCCGGTGAAGGTGTACCCCAACGGCGCTGAGGACGAGTCG
.....

POMC_reference_CanFam3.1      GCCGAGGCCTTCCCCGTCGAGTTCAGAAGGAGCTGGCCCGGACGCGGCTGGAGCCGGCG
All_breed_consensus          GCCGAGGCCTTCCCCGTCGAGTTCAGAAGGAGCTGGCCCGGACGCGGCTGGAGCCGGCG
.....

POMC_reference_CanFam3.1      CTCGGCCCC-AGGGCCCGCCCGGGCGTGGCGCGCTGGCCGACCTGGAGTACGGCCTG
All_breed_consensus          CTCGGCCCCAGGGCCCGCCCGGGCGTGGCGCGCTGGCCGACCTGGAGTAYGGCCTG
.....
                                     (a)      (b)
POMC_reference_CanFam3.1      GTGGCGGAGCCGGGGCGGCGAGAAGAAGGACGACGGGCCCTACAAGATGGAGCACTTC
All_breed_consensus          GTGGCGGAGCCGGGGCGGCGAGAAGAAGGACGACGGGCCCTACAAGATGGAGCACTTC
.....
                                     (c)      (d)      (e)
POMC_reference_CanFam3.1      CGCTGGGGCAGCCCGCCCAAGGACAAAGCGCTACGGCGGCTTCATGAGCTCGGAGAGGAGC
All_breed_consensus          CGCTGGGGCAGCCCGCCCAAGGACAAAGCGCTACGGCGGCTTCATGAGCTCGGAGAGGAGC
.....
                                     (f)
POMC_reference_CanFam3.1      CAGACGCCCTGGTGACGCTGTTCAAAAACGCCATCATCAAGAACGCCCAAGAAGGGC
All_breed_consensus          CAGACGCCCTGGTGACGCTGTTCAAAAACGCCATCATCAAGAACGCCCAAGAAGGGC
.....

POMC_reference_CanFam3.1      CAGTGA
All_breed_consensus          CAGTGA
*****
  
```

42

43 **Supplemental References**

- 44 1 Yan, J. & Tao, Y. X. Pharmacological characterization of canine melancortin-4 receptor and its  
45 natural variant V213F. *Domestic animal endocrinology* **41**, 91-97,  
46 doi:10.1016/j.domaniend.2011.05.002 (2011).
- 47 2 Wong, A. K. & Neff, M. W. DOGSET: pre-designed primer sets for fine-scale mapping and  
48 DNA sequence interrogation in the dog. *Animal genetics* **40**, 569-571, doi:10.1111/j.1365-  
49 2052.2009.01875.x (2009).

50
